# Supplementary material for: Genetic regulators of cytokine responses in children from West Africa: the impact of BCG vaccination
Source: Research Square preprint supplement (doi:10.21203/rs.3.rs-1502935/v1), 2022-04-01
Supplement: Supplementary file 1 [file 083f6d2e4e3f170d1217b522.xlsx]

## Sheet: Sheet1
Supplementary Table 1. Detailed information for the pathways enriched in the control group
KEGG database
geneSet	description	size	overlap	expect	enrichmentRatio	pValue	FDR	overlapId	userId
hsa04062	Chemokine signaling pathway	189	3	0.480787	6.23977	0.0114628	1	3055;409;58191	ARRB2;HCK;CXCL16
hsa01524	Platinum drug resistance	73	2	0.185701	10.77	0.0144711	1	4292;598	BCL2L1;MLH1
hsa04666	Fc gamma R-mediated phagocytosis	91	2	0.23149	8.63968	0.0219454	1	3055;5338	PLD2;HCK
hsa04928	Parathyroid hormone synthesis, secretion and action	106	2	0.269648	7.41708	0.0291576	1	409;5338	ARRB2;PLD2
hsa04611	Platelet activation	123	2	0.312893	6.39196	0.0383203	1	2811;85366	GP1BA;MYLK2
hsa04140	Autophagy	128	2	0.325613	6.14227	0.041202	1	598;83734	BCL2L1;ATG10
hsa03010	Ribosome	153	2	0.389209	5.13863	0.056777	1	11222;6228	RPS23;MRPL3
hsa03430	Mismatch repair	23	1	0.0585085	17.0915	0.0569817	1	4292	MLH1
hsa00591	Linoleic acid metabolism	29	1	0.0737716	13.5554	0.0713325	1	246	ALOX15
hsa04136	Autophagy	32	1	0.0814031	12.2845	0.0784301	1	83734	ATG10
Reactome database
geneSet	description	size	overlap	expect	enrichmentRatio	pValue	FDR	overlapId	userId
R-HSA-430116	GP1b-IX-V activation signalling	12	2	0.0306993	65.1481	0.000409	0.707572	2811;7534	YWHAZ;GP1BA
R-HSA-4086400	PCP/CE pathway	92	3	0.235361	12.7464	0.00161135	1	409;5216;5694	ARRB2;PFN1;PSMB6
R-HSA-70263	Gluconeogenesis	34	2	0.0869812	22.9935	0.00336188	1	2027;8402	SLC25A11;ENO3
R-HSA-76002	Platelet activation, signaling and aggregation	262	4	0.670267	5.96777	0.00415359	1	2811;409;5216;7534	ARRB2;YWHAZ;GP1BA;PFN1
R-HSA-109606	Intrinsic Pathway for Apoptosis	44	2	0.112564	17.7677	0.00558056	1	598;7534	BCL2L1;YWHAZ
R-HSA-449147	Signaling by Interleukins	462	5	1.18192	4.2304	0.00571167	1	246;3055;5694;598;7534	BCL2L1;ALOX15;YWHAZ;HCK;PSMB6
R-HSA-3858494	Beta-catenin independent WNT signaling	145	3	0.370949	8.08736	0.00583547	1	409;5216;5694	ARRB2;PFN1;PSMB6
R-HSA-512988	Interleukin-3, Interleukin-5 and GM-CSF signaling	48	2	0.122797	16.287	0.0066125	1	3055;7534	YWHAZ;HCK
R-HSA-9604323	Negative regulation of NOTCH4 signaling	54	2	0.138147	14.4774	0.00831004	1	5694;7534	YWHAZ;PSMB6
R-HSA-109581	Apoptosis	169	3	0.432348	6.93886	0.00889703	1	5694;598;7534	BCL2L1;YWHAZ;PSMB6
