# Supplementary material for: Genetic regulators of cytokine responses in children from West Africa: the impact of BCG vaccination
Source: Research Square preprint supplement (doi:10.21203/rs.3.rs-1502935/v1), 2022-04-01
Supplement: Supplementary file 2 [file 7ee33f37931d1818c524adc0.xlsx]

## Sheet: Sheet1
Supplementary Table 2. Detailed information for the pathways enriched in the BCG-vaccinated group
KEGG database
geneSet	description	size	overlap	expect	enrichmentRatio	pValue	FDR	overlapId	userId
hsa04660	T cell receptor signaling pathway	101	5	0.34727	14.398	2e-05	0.00650375	10298;4793;5534;5777;920	PPP3R1;PTPN6;CD4;PAK4;NFKBIB
hsa04662	B cell receptor signaling pathway	71	3	0.24412	12.289	0.00175918	0.226483	4793;5534;5777	PPP3R1;PTPN6;NFKBIB
hsa04630	JAK-STAT signaling pathway	162	4	0.557007	7.18123	0.0020842	0.226483	282616;282617;282618;5777	PTPN6;IFNL2;IFNL3;IFNL1
hsa04658	Th1 and Th2 cell differentiation	92	3	0.316325	9.48391	0.00368574	0.300387	4793;5534;920	PPP3R1;CD4;NFKBIB
hsa05170	Human immunodeficiency virus 1 infection	212	4	0.728923	5.48755	0.00549176	0.305957	10298;2784;5534;920	PPP3R1;GNB3;CD4;PAK4
hsa04659	Th17 cell differentiation	107	3	0.3679	8.15439	0.00563111	0.305957	4793;5534;920	PPP3R1;CD4;NFKBIB
hsa05150	Staphylococcus aureus infection	56	2	0.192546	10.3871	0.0156041	0.689874	715;716	C1R;C1S
hsa04060	Cytokine-cytokine receptor interaction	294	4	1.01087	3.95701	0.0169294	0.689874	282616;282617;282618;920	CD4;IFNL2;IFNL3;IFNL1
hsa00010	Glycolysis / Gluconeogenesis	68	2	0.233806	8.55412	0.02251	0.692846	2026;7167	ENO2;TPI1
hsa00562	Inositol phosphate metabolism	74	2	0.254435	7.86054	0.0263577	0.692846	7167;8821	INPP4B;TPI1
Reactome database
geneSet	description	size	overlap	expect	enrichmentRatio	pValue	FDR	overlapId	userId
R-HSA-8854691	Interleukin-20 family signaling	25	3	0.0900218	33.3253	9.38e-05	0.162097	282616;282617;282618	IFNL2;IFNL3;IFNL1
R-HSA-173623	Classical antibody-mediated complement activation	6	2	0.0216052	92.5702	0.000188	0.162153	715;716	C1R;C1S
R-HSA-166786	Creation of C4 and C2 activators	14	2	0.0504122	39.6729	0.00111805	0.643998	715;716	C1R;C1S
R-HSA-166663	Initial triggering of complement	23	2	0.0828201	24.1487	0.00304559	1	715;716	C1R;C1S
R-HSA-389948	PD-1 signaling	23	2	0.0828201	24.1487	0.00304559	1	5777;920	PTPN6;CD4
R-HSA-449836	Other interleukin signaling	26	2	0.0936227	21.3623	0.0038858	1	282618;920	CD4;IFNL1
R-HSA-449147	Signaling by Interleukins	462	6	1.6636	3.60663	0.00571155	1	282616;282617;282618;4793;5777;920	PTPN6;CD4;IFNL2;IFNL3;IFNL1;NFKBIB
R-HSA-70263	Gluconeogenesis	34	2	0.12243	16.3359	0.00658712	1	2026;7167	ENO2;TPI1
R-HSA-8955332	Carboxyterminal post-translational modifications of tubulin	36	2	0.129631	15.4284	0.00736392	1	23170;25809	TTLL12;TTLL1
R-HSA-983705	Signaling by the B Cell Receptor (BCR)	112	3	0.403298	7.43867	0.00749454	1	4793;5534;5777	PPP3R1;PTPN6;NFKBIB
